# Supplementary material for: Diastereoselective Mannich reactions of pseudo-C2-symmetric glutarimide with activated imines
Source: publisher site journal article supplement (doi:10.3762/bjoc.13.244), 2017-11-21
Supplement: Additional file 1 [file 1860-5397-13-244-S1.pdf]

**Supporting Information**  
**for**  
**Diastereoselective Mannich reactions of**  
**pseudo- $C_2$ -symmetric glutarimide with activated**  
**imines**

Tatsuya Ishikawa,<sup>1</sup> Tomoko Kawasaki-Takasuka,<sup>1</sup> Toshio Kubota,<sup>2</sup> and Takashi Yamazaki\*<sup>1</sup>

Address: <sup>1</sup>Division of Applied Chemistry, Institute of Engineering, Tokyo University of Agriculture and Technology, 2-24-16 Nakamachi, Koganei 184-8588, Japan and

<sup>2</sup>Department of Biomolecular Functional Engineering, Ibaraki University, Nakanarusawa 4-12-1, Hitachi 316-8511, Japan

Email: Takashi Yamazaki - tyamazak@cc.tuat.ac.jp

\*Corresponding author

**Experimental procedures, characterization data, copies of  $^1\text{H}$  and  $^{13}\text{C}$  NMR spectra for the new compounds, and crystallographic analysis data**

## Table of Contents

|                                                                                                                                                                    |     |
|--------------------------------------------------------------------------------------------------------------------------------------------------------------------|-----|
| 1. General information.....                                                                                                                                        | S2  |
| 2. Experimental procedures and characterization data .....                                                                                                         | S3  |
| General procedure for the reactions of the oxazolidinone-installed imide <b>1a</b><br>from 3-(trifluoromethyl)-glutaric acid with tosylated imines <b>2</b> .....  | S3  |
| 1,5-bis[(4 <i>S</i> )-4-Isopropyl-2-oxo-1,3-oxazolidin-3-yl]-2-{phenyl(4-toluene-<br>sulfonamido)methyl}-3-(trifluoromethyl)-pentane-1,5-dione ( <b>3a</b> ) ..... | S3  |
| 3. <sup>1</sup> H and <sup>13</sup> C NMR spectra for new compounds.....                                                                                           | S7  |
| 4. Crystallographic data for compound <b>3a</b> .....                                                                                                              | S13 |
| 5. References .....                                                                                                                                                | S15 |

### 1. General Information

<sup>1</sup>H (300.40 MHz), <sup>13</sup>C (75.45 Hz), and <sup>19</sup>F (282.65 Hz) NMR spectra were recorded on a JEOL AL 300 spectrometer in CDCl<sub>3</sub> unless otherwise noted. Chemical shifts were recorded in parts per million (ppm) downfield from internal tetramethylsilane (Me<sub>4</sub>Si: δ 0.00 ppm for <sup>1</sup>H and <sup>13</sup>C, respectively) or hexafluorobenzene (C<sub>6</sub>F<sub>6</sub>: δ -163.00 ppm for <sup>19</sup>F). Data were tabulated in the following order: number of protons, multiplicity (s, singlet; d, doublet; t, triplet; q, quartet; quint, quintet; sex, sextet; m, multiplet; b, broad peak), coupling constants in hertz. Infrared (IR) spectra were obtained on a JASCO A-302 spectrometer and reported in wave numbers (cm<sup>-1</sup>). Elemental analyses were performed with a Perkin-Elmer Series II CHNS/O analyzer. JEOL JMS-700 was used for obtaining high resolution mass spectrometry data operated in the positive ionization mode.

Most of reactions where an organic solvent was employed were performed under argon atmosphere with magnetic stirring using flame-dried glassware. Anhydrous THF, Et<sub>2</sub>O, and CH<sub>2</sub>Cl<sub>2</sub> were purchased and used without further purification. Unless otherwise noted, materials were obtained from commercial suppliers and were used without further purification. Analytical thin-layer chromatography (TLC) was routinely used for monitoring reactions by generally using a mixture of hexane (Hex) and ethyl acetate (AcOEt) (v/v). Spherical neutral silica gel (63–210 μm or 40–50 μm) was employed for column chromatography and flash chromatography, respectively.

## 2. Experimental procedures and characterization data

**General procedure for the reactions of the oxazolidinone-installed imide **1a** from the 3-(trifluoromethyl)glutaric acid with tosylated imines **2**.**

**1,5-bis[(4*S*)-4-isopropyl-2-oxo-1,3-oxazolidin-3-yl]-2-{phenyl(4-toluenesulfonamido)methyl}-3-(trifluoromethyl)pentane-1,5-dione (**3a**).**

To a 30 mL two-necked flask containing THF (5 mL) and 0.08 mL (0.6 mmol) diisopropylamine under an argon atmosphere was added BuLi (0.36 mL, 0.58 mmol) at 0 °C and the mixture was stirred for 30 min at that temperature. After cooling to –80 °C, 1,5-bis[(4*S*)-4-isopropyl-2-oxo-1,3-oxazolidin-3-yl]-3-(trifluoromethyl)pentane-1,5-dione [**1a**, 0.0845 g, 0.200 mmol) was added to the LDA solution and stirred for 30 min at –80 °C where *N*-benzylidene-4-toluenesulfonamide [**2**](**2ac**, 0.1141 g 0.440 mmol) was added and the whole mixture was stirred for further 6 h at that temperature. Then, aqueous NH<sub>4</sub>Cl was added, the mixture extracted three times with AcOEt, and the collected AcOEt layer was dried over anhydrous Na<sub>2</sub>SO<sub>4</sub>. Filtration and evaporation afforded a crude material which was chromatographed on silica gel using hexane/AcOEt 2:1 as an eluent to give 0.1026 g (0.15 mmol) of the desired 1,5-bis[(4*S*)-4-isopropyl-2-oxo-1,3-oxazolidin-3-yl]-2-{phenyl(4-toluenesulfonamido)-methyl}-3-(trifluoromethyl)pentane-1,5-dione (**3a**) as a 73:17:(10) mixture of diastereoisomers in 75% yield. The major stereoisomer was isolated by recrystallization (to the sample, dissolved in a small amount of AcOEt at 60 °C hexane was added until a clear solution was obtained. Cooling to room temperature afforded the desired main products) whose spectral data are given below.

Mp.: 186.5–187.0 °C, Rf=0.58 (hexane:AcOEt=1:1),  $[\alpha]_D^{24} +33.0$  (*c* 1.0, CHCl<sub>3</sub>). <sup>1</sup>H NMR: δ 0.73 (3H, d, *J*=6.9 Hz), 0.87 (3H, d, *J*=7.2 Hz), 0.99 (3H, d, *J*=7.2 Hz), 1.01 (3H, d, *J*=6.6 Hz), 2.26–2.34 (1H, m), 2.30 (3H, s), 2.47–2.53 (1H, m), 2.86–3.00 (1H, m), 3.12 (1H, dd, *J*=18.6, 6.0 Hz), 3.60 (1H, dd, *J*=18.3, 6.0 Hz), 4.19–4.31 (4H, m), 4.34–4.38 (1H, m), 4.40–4.43 (1H, m), 4.77 (1H, t, *J*=9.9 Hz), 5.04 (1H, dd, *J*=9.0, 3.3 Hz), 5.76 (1H, d, *J*=10.2 Hz), 7.00 (2H, d, *J*=8.4 Hz), 7.10–7.14 (5H, m), 7.42 (2H, d, *J*=8.4 Hz). <sup>13</sup>C NMR: δ 14.5, 14.6, 18.0, 18.1, 21.3, 28.28, 28.33, 31.1, 38.1 (q, *J*=26.6 Hz), 43.7, 58.8, 59.4, 59.7, 63.5, 63.6, 126.9 (q, *J*=279.8 Hz), 126.9, 127.0, 128.1, 128.6, 129.1, 137.0, 137.2, 142.9, 154.0, 154.6, 169.6, 170.8. <sup>19</sup>F NMR: δ –71.96 (d, *J*=9.0 Hz), –70.30 (d, *J*=9.0 Hz; minor diastereomer). IR (KBr): ν 548, 559, 668, 705, 817, 1120, 1165, 1207, 1251, 1304, 1375, 1388, 1605, 1707, 1781, 2872, 2955, 3273, 3550, 3623 cm<sup>-1</sup>. Anal. Calcd for C<sub>32</sub>H<sub>38</sub>F<sub>3</sub>N<sub>3</sub>O<sub>8</sub>S: C, 56.38; H, 5.62; N, 6.16. Found: C, 56.16; H, 5.55; N, 6.16.

**1,5-bis[(4S)-4-Isopropyl-2-oxo-1,3-oxazolidin-3-yl]-2-[(4-bromophenyl)(4-toluene-sulfonamido)methyl]-3-(trifluoromethyl)pentane-1,5-dione (3b)**

91% yield as a 62:17:(21) mixture. mp.: 140.0–141.0 °C, Rf=0.58 (hexane: AcOEt=1:1).  $[\alpha]_D^{26} +20.2$  (*c* 0.89, CHCl<sub>3</sub>). <sup>1</sup>H NMR: δ 0.72 (3H, d, *J*=6.9 Hz), 0.87 (3H, d, *J*=7.2 Hz), 1.00 (3H, d, *J*=6.9 Hz), 1.01 (3H, d, *J*=6.9 Hz), 2.21–2.32 (1H, m), 2.36 (3H, s), 2.46–2.57 (1H, m), 2.89–2.97 (1H, m), 3.05 (1H, dd, *J*=18.3, 5.4 Hz), 3.60 (1H, dd, *J*=18.3, 7.2 Hz), 4.18–4.29 (4H, m), 4.32–4.36 (1H, m), 4.41–4.46 (1H, m), 4.75 (1H, t, *J*=9.9 Hz), 5.00 (1H, dd, *J*=9.3, 3.3 Hz), 5.83 (1H, d, *J*=10.2 Hz), 7.01 (2H, d, *J*=8.4 Hz), 7.06 (2H, d, *J*=8.4 Hz), 7.24 (2H, d, *J*=8.4 Hz) 7.43 (2H, d, *J*=8.4 Hz). <sup>13</sup>C NMR: δ 14.5, 14.6, 18.0, 18.1, 21.1, 28.35, 28.44, 31.3, 38.1 (q, *J*=27.3 Hz), 43.5, 58.8, 59.0, 59.7, 63.6, 63.7, 122.3, 126.8 (q, *J*=279.7 Hz), 127.0, 128.9, 129.2, 131.7, 136.2, 137.1, 143.4, 154.0, 154.7, 169.7, 170.6. <sup>19</sup>F NMR: δ –72.03 (d, *J* = 9.0 Hz), –69.73 (d, *J* = 9.0 Hz; second major diastereomer), –70.70 (d, *J* = 9.3 Hz; minor diastereomer). IR (KBr): ν 545, 666, 716, 811, 855, 956, 1016, 1111, 1173, 1227, 1311, 1384, 1495, 1611, 1700, 1783, 2878, 2955, 3267, 3567 cm<sup>-1</sup>. Anal. Calcd for C<sub>32</sub>H<sub>37</sub>BrF<sub>3</sub>N<sub>3</sub>O<sub>8</sub>S: C, 50.53; H, 4.90; N, 5.52. Found: C, 50.35; H, 5.12; N, 5.07.

**1,5-bis[(4S)-4-Isopropyl-2-oxo-1,3-oxazolidin-3-yl]-2-[(4-nitrophenyl)(4-toluene-sulfonamido)methyl]-3-(trifluoromethyl)pentane-1,5-dione (3c)**

92% yield as a 62:13:(22) mixture. mp.: 140.5–143.0 °C, Rf=0.58 (hexane: AcOEt=1:1),  $[\alpha]_D^{25} +0.72$  (*c* 1.8, CHCl<sub>3</sub>). <sup>1</sup>H NMR: δ 0.61 (3H, d, *J*=6.6 Hz), 0.84 (3H, d, *J*=6.9 Hz), 1.02 (3H, d, *J*=6.9 Hz), 1.02 (3H, d, *J*=6.9 Hz), 2.14–2.24 (1H, m), 2.32 (3H, s), 2.50–2.61 (1H, m), 2.92–3.00 (2H, m), 3.62 (1H, dd, *J*=18.3, 7.5 Hz), 4.17–4.33 (5H, m), 4.43–4.48 (1H, m), 4.91 (1H, t, *J*=9.0 Hz), 5.09 (1H, dd, *J*=8.7, 3.3 Hz), 6.01 (1H, d, *J*=9.6 Hz), 7.08 (2H, d, *J*=8.4 Hz), 7.41 (2H, d, *J*=8.7 Hz), 7.50 (2H, d, *J*=7.8 Hz) 8.01 (2H, d, *J*=8.7 Hz). <sup>13</sup>C NMR: δ 14.4, 14.6, 18.0, 18.1, 21.4, 28.3, 28.4, 31.5 (q, *J*=1.9 Hz), 38.1 (q, *J*=26.6 Hz), 43.4, 58.5, 59.1, 59.7, 63.6, 63.8, 123.7, 126.7 (q, *J*=279.8 Hz), 127.1, 128.4, 129.4, 143.7, 144.7, 147.5, 154.1, 154.5, 169.7, 170.3. <sup>19</sup>F NMR: δ –72.09 (d, *J*=9.3 Hz), –70.71 (d, *J*=9.3 Hz; second major diastereomer), –69.58 (d, *J*=9.3 Hz; third major diastereomer), –68.71 (d, *J*=9.3 Hz; minor diastereomer). IR (KBr): ν 537, 549, 561, 671, 703, 817, 1111, 1165, 1208, 1305, 1348, 1377, 1389, 1524, 1611, 1703, 1776, 2978, 3261, 3633 cm<sup>-1</sup>. Anal. Calcd for C<sub>32</sub>H<sub>37</sub>F<sub>4</sub>N<sub>3</sub>O<sub>8</sub>S: C, 54.93; H, 5.33; N, 6.01. Found: C, 53.10; H, 5.52; N, 7.72.

**1,5-bis[(4S)-4-Isopropyl-2-oxo-1,3-oxazolidin-3-yl]-2-[(3-fluorophenyl)(4-toluenesulfonamido)methyl]-3-(trifluoromethyl)pentane-1,5-dione (3d)**

78% yield, a 81:6:(13) mixture. mp.: 160.8-161.5 °C, Rf=0.58 (hexane:AcOEt= 1:1),  $[\alpha]_D^{24} +42.5$  (c 5.7, CHCl<sub>3</sub>). <sup>1</sup>H NMR: δ 0.72 (3H, d, *J*=6.9 Hz), 0.87 (3H, d, *J*=6.9 Hz), 0.99 (3H, d, *J*=6.9 Hz), 1.01 (3H, d, *J*=6.9 Hz), 2.27–2.32 (1H, m), 2.32 (3H, s), 2.50–2.53 (1H, m), 2.91–2.96 (1H, m), 3.05 (1H, dd, *J*=18.3, 5.4 Hz), 3.61 (1H, dd, *J*=18.6, 6.6 Hz), 4.19–4.29 (4H, m), 4.32–4.36 (1H, m), 4.41–4.45 (1H, m), 4.76 (1H, t, *J*=9.9 Hz), 5.03 (1H, dd, *J*=9.3, 3.3 Hz), 5.85 (1H, d, *J*=9.9 Hz), 6.74–6.77 (1H, m), 6.84 (1H, dt, *J*=8.4, 1.8 Hz), 6.97 (1H, d, *J*=8.1 Hz), 7.06 (2H, d, *J*=8.1 Hz), 7.14 (1H, dt, *J*=8.1, 6.0 Hz), 7.46 (2H, d, *J*=8.1 Hz). <sup>13</sup>C NMR: δ 14.3, 14.5, 17.75, 17.78, 17.83, 17.86, 21.08, 21.11, 28.1, 31.0, 37.9 (q, *J*=26.7 Hz), 43.4, 58.8, 59.5, 63.5, 114.3 (d, *J*=22.3 Hz), 114.8 (d, *J*=21.1 Hz), 122.4, 126.7 (q, *J*=279.8 Hz), 126.9, 129.0, 130.2 (d, *J*=8.1 Hz), 136.9, 139.6 (d, *J*=6.9 Hz), 143.0 (d, *J*=1.2 Hz), 154.0, 154.3, 162.4 (d, *J*=246.9 Hz), 169.4, 170.5. <sup>19</sup>F NMR: δ –113.72 (1F, m), –114.00 (1F, m; second major diastereomer), –112.57 (1F, m; third major diastereomer and the peak for the minor diastereomer was not found out possibly due to overlap), –71.95 (3F, d, *J*=9.0 Hz), –67.73 (3F, d, *J*=9.0 Hz; second major diastereomer), –69.58 (3F, d, *J*=9.0 Hz; third major diastereomer), –70.57 (3F, d, *J*=9.4 Hz; minor diastereomer). IR (KBr): ν 553, 666, 671, 703, 812, 1093, 1120, 1164, 1205, 1245, 1304, 1342, 1389, 1488, 1707, 1781, 2361, 2967, 3277, 3639 cm<sup>-1</sup>. Anal. Calcd for C<sub>32</sub>H<sub>37</sub>F<sub>4</sub>N<sub>3</sub>O<sub>8</sub>S: C, 54.93; H, 5.33; N, 6.01. Found: C, 54.58; H, 5.45; N, 5.97.

**1,5-bis[(4S)-4-Isopropyl-2-oxo-1,3-oxazolidin-3-yl]-2-[2-furyl(4-toluenesulfonamido)methyl]-3-(trifluoromethyl)-pentane-1,5-dione (inseparable diastereomer mixture) (3e)**

55% yield, a mixture of 51:22:(27). Rf=0.58 (hexane:AcOEt=1:1). <sup>1</sup>H NMR: δ 0.91 (3H, d, *J*=6.6 Hz), 0.92 (3H, d, *J*=6.9 Hz), 0.98 (3H, d, *J*=8.1 Hz), 1.00 (3H, d, *J*=7.9 Hz), 2.34 (3H, s), 2.40–2.51 (1H, m), 2.86–2.95 (1H, m), 3.17 (1H, dd, *J*=18.3, 6.3 Hz), 3.56 (1H, dd, *J*=18.6, 6.3 Hz), 4.24–4.33 (5H, m), 4.41–4.45 (2H, m), 4.41–4.45 (1H, m), 4.87 (1H, t, *J*=10.2 Hz), 5.09 (1H, dd, *J*=10.2, 2.4 Hz), 5.59 (1H, d, *J*=10.5 Hz), 6.00–6.05 (2H, m), 7.10–7.14 (2H, m), 7.34 (1H, t, *J*=9.0 Hz), 7.49 (2H, d, *J*=8.4 Hz). <sup>13</sup>C NMR: δ 14.5, 14.7, 17.99, 18.02, 21.4, 28.2, 31.10, 31.12, 38.2 (q, *J*=26.6 Hz), 41.7, 53.5, 58.7, 59.6, 63.47, 63.55, 109.8, 110.0, 126.7 (q, *J*=279.7 Hz), 126.9, 129.2, 137.0, 142.8, 143.0, 148.7, 153.9, 154.3, 169.8, 170.3. <sup>19</sup>F NMR: δ –71.85 (d, *J*=9.0 Hz), –70.59 (d, *J*=9.3 Hz; second major diastereomer), –69.88 (d, *J*=9.0 Hz; third major diastereomer), –67.43 (d, *J*=9.0 Hz; minor diastereomer). IR (KBr): ν 495, 555, 666,

700, 744, 811, 933, 1066, 1117, 1167, 1217, 1306, 1394, 1589, 1716, 1778, 2883, 2961, 3267, 3545  $\text{cm}^{-1}$ . HRMS-FAB ( $m/z$ ) :  $[\text{M}+\text{H}]^+$  calcd. for  $\text{C}_{30}\text{H}_{36}\text{F}_3\text{N}_3\text{O}_9\text{S}$ , 672.2203; found, 672.2197.

**1,5-bis[(4S)-4-Isopropyl-2-oxo-1,3-oxazolidin-3-yl]-2-[(4-methylphenyl)(4-toluene-sulfonamido)methyl]-3-(trifluoromethyl)pentane-1,5-dione (3f)**

66% yield, a 51:16:(33) mixture. mp.: 129.0-131.0  $^{\circ}\text{C}$ , Rf=0.50 (hexane: AcOEt=1:1),  $[\alpha]_{\text{D}}^{21} +67.7$  (c 0.56,  $\text{CHCl}_3$ ).  $^1\text{H}$  NMR:  $\delta$  0.74 (3H, d,  $J=6.9$  Hz), 0.88 (3H, d,  $J=6.9$  Hz), 0.98 (3H, d,  $J=6.9$  Hz), 1.00 (3H, d,  $J=6.6$  Hz), 2.24 (3H, s), 2.29–2.34 (1H, m), 2.31 (3H, s), 2.43–2.54 (1H, m), 2.88–3.02 (1H, m), 3.14 (1H, dd,  $J=18.6, 6.6$  Hz), 3.59 (1H, dd,  $J=18.3, 6.0$  Hz), 4.19–4.31 (4H, m), 4.35–4.37 (1H, m), 4.39–4.43 (1H, m), 4.72 (1H, t,  $J=9.9$  Hz), 5.00 (1H, dd,  $J=9.9, 3.3$  Hz), 5.71 (1H, d,  $J=10.2$  Hz), 6.89–7.02 (6H, m), 7.41 (2H, d,  $J=8.1$  Hz).  $^{13}\text{C}$  NMR:  $\delta$  14.5, 14.7, 18.0, 18.1, 21.0, 21.3, 28.3, 28.4, 31.0, 38.2 (q,  $J=26.7$  Hz), 43.7, 58.9, 59.2, 59.7, 63.5, 63.6, 126.8, 126.9 (q,  $J=280.4$  Hz), 127.1, 129.0, 129.2, 134.0, 137.3, 138.0, 142.8, 153.9, 154.7, 169.7, 170.9.  $^{19}\text{F}$  NMR:  $\delta$  -71.95 (d,  $J = 9.0$  Hz), -69.60 (d,  $J = 9.0$  Hz; second major diastereomer), -70.56 (d,  $J = 9.3$  Hz; third major diastereomer), -73.14 (d,  $J = 9.0$  Hz; minor diastereomer). IR (KBr):  $\nu$  539, 569, 665, 1094, 1162, 1208, 1256, 1305, 1332, 1366, 1393, 1405, 1611, 1686, 1697, 1760, 1797, 2972, 3100, 3577  $\text{cm}^{-1}$ . HRMS-FAB ( $m/z$ ) :  $[\text{M}+2\text{H}]^+$  calcd. for  $\text{C}_{33}\text{H}_{42}\text{F}_3\text{N}_3\text{O}_8\text{S}$ , 697.2645; found, 697.2675.

### 3. $^1\text{H}$ and $^{13}\text{C}$ NMR spectra

1,5-bis[(4*S*)-4-Isopropyl-2-oxo-1,3-oxazolidin-3-yl]-2-{phenyl(4-toluenesulfonamido)methyl}-3-(trifluoromethyl)pentane-1,5-dione (**3a**)

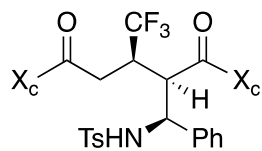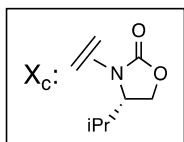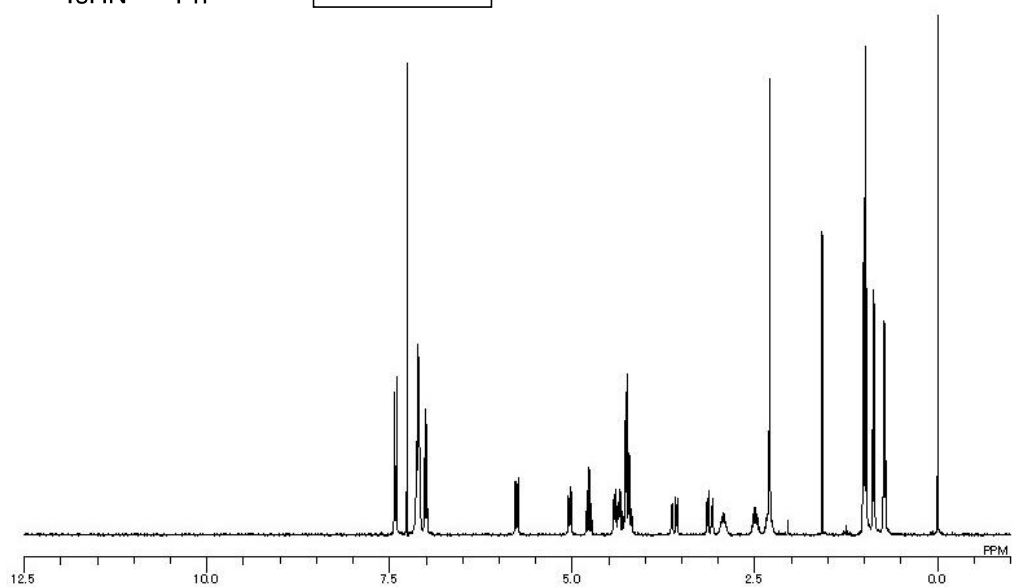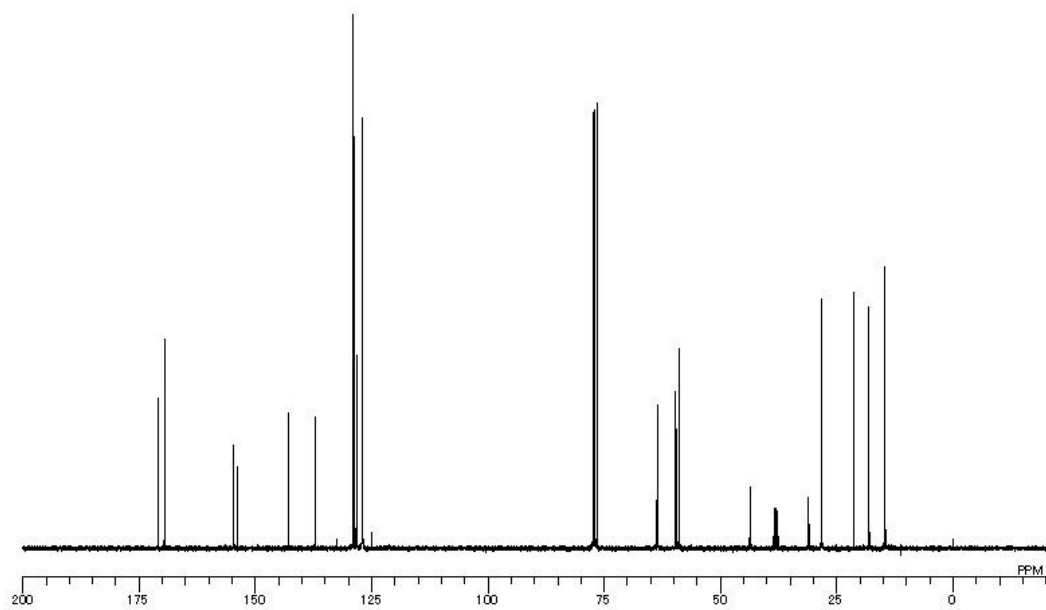

1,5-bis[(4*S*)-4-Isopropyl-2-oxo-1,3-oxazolidin-3-yl]-2-[(4-bromophenyl)(4-toluenesulfonamido)-methyl]-3-(trifluoromethyl)pentane-1,5-dione (**3b**)

(Stereochemistry was assumed on the basis of the one of **3a**)

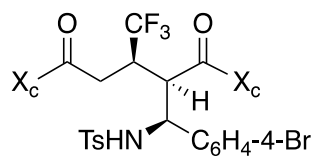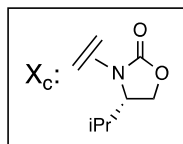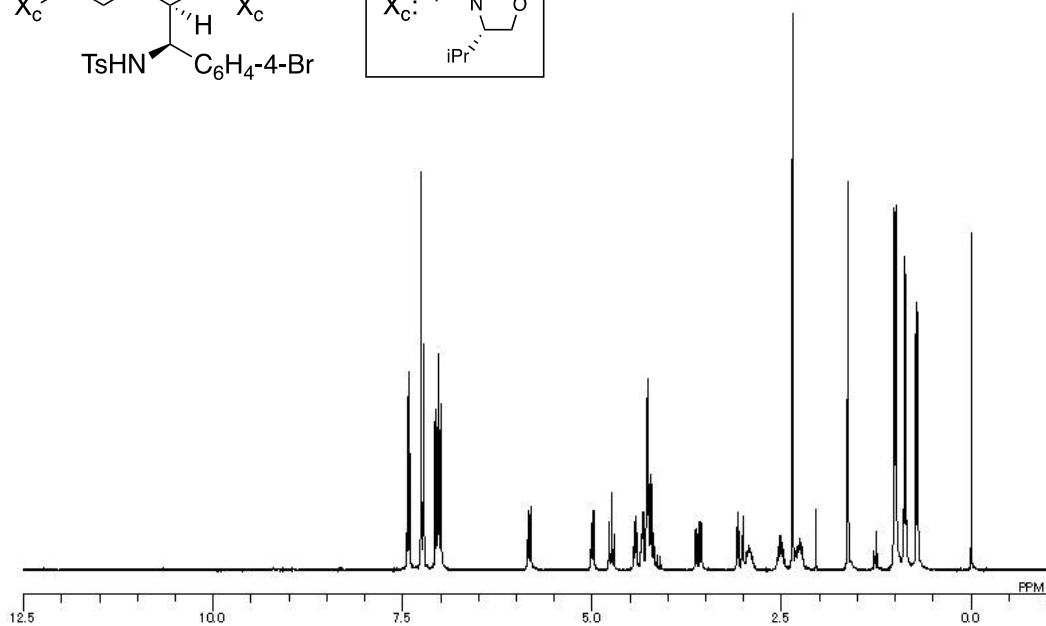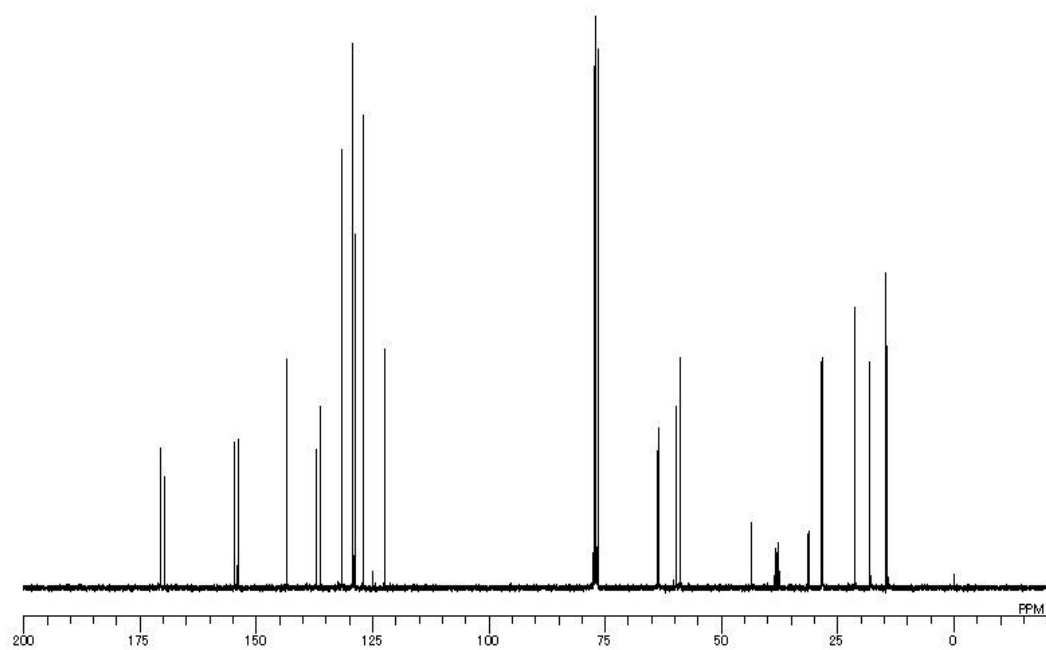



1,5-bis[(4*S*)-4-Isopropyl-2-oxo-1,3-oxazolidin-3-yl]-2-[(4-nitrophenyl)(4-toluenesulfonamido)-methyl]-3-(trifluoromethyl)pentane-1,5-dione (**3c**)

(Stereochemistry was assumed on the basis of the one of **3a**)

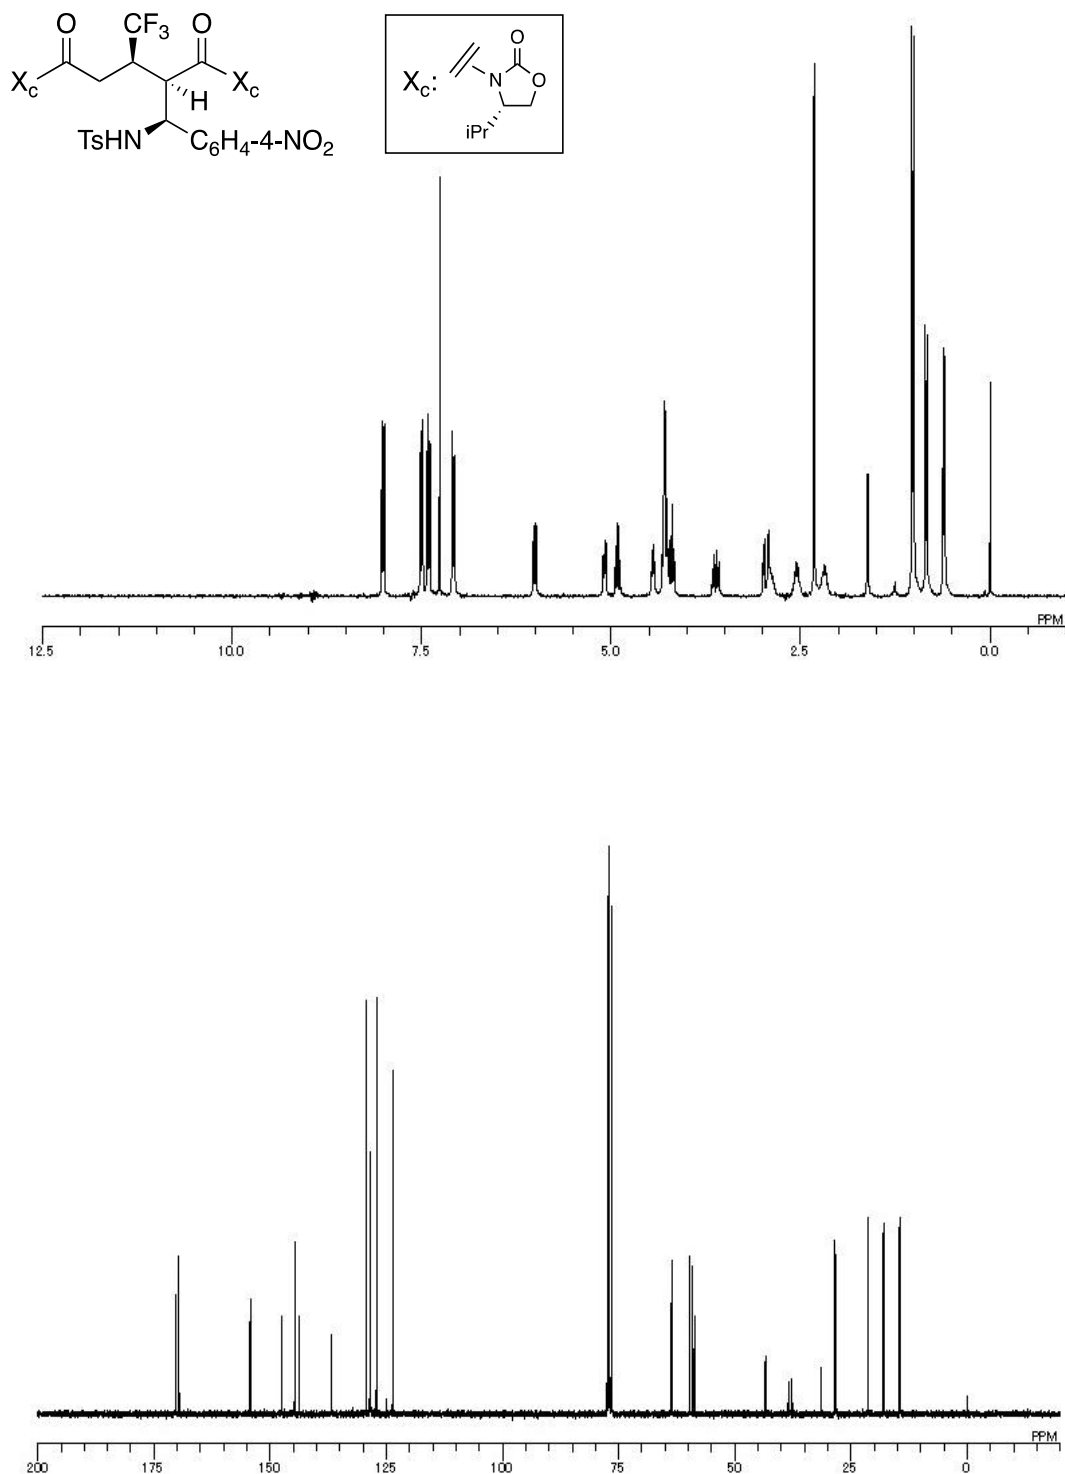

1,5-bis[(4*S*)-4-Isopropyl-2-oxo-1,3-oxazolidin-3-yl]-2-[(3-fluorophenyl)(4-toluenesulfonamido)-methyl]-3-(trifluoromethyl)pentane-1,5-dione (**3d**)

(Stereochemistry was assumed on the basis of the one of **3a**)

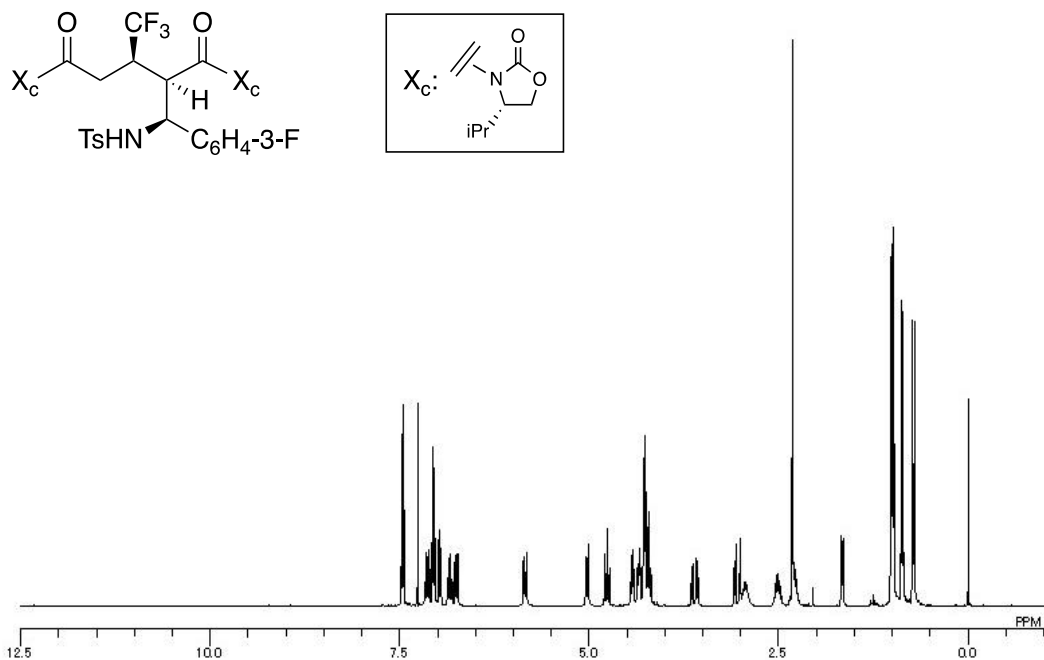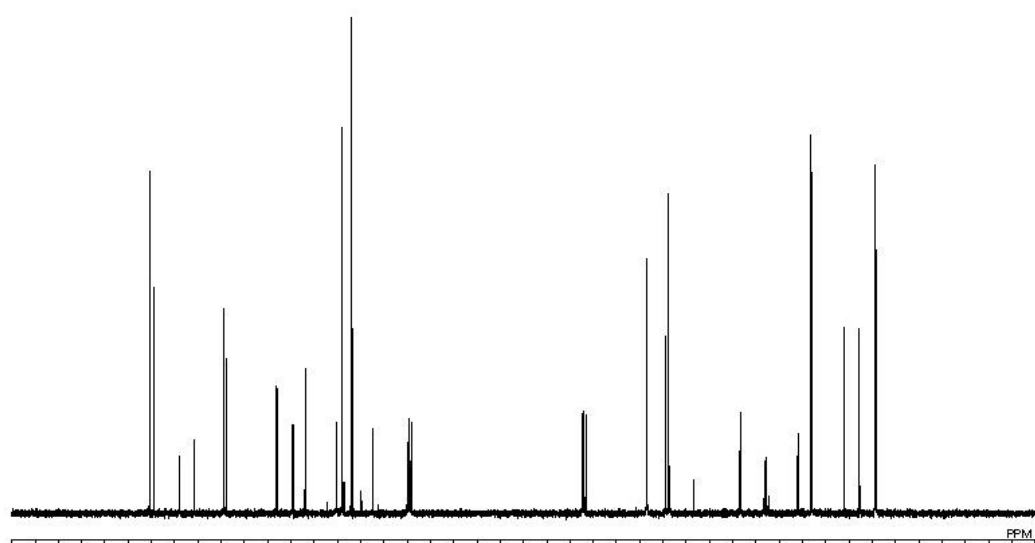

1,5-bis[(4*S*)-4-Isopropyl-2-oxo-1,3-oxazolidin-3-yl]-2-{2-furyl(4-toluenesulfonamido)methyl}-3-(trifluoromethyl)-pentane-1,5-dione (inseparable diastereomer mixture) (**3e**)

(Stereochemistry was assumed on the basis of the one of **3a**)

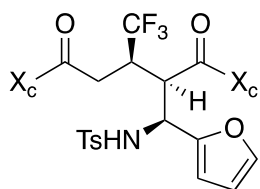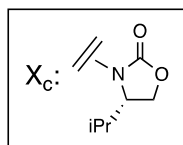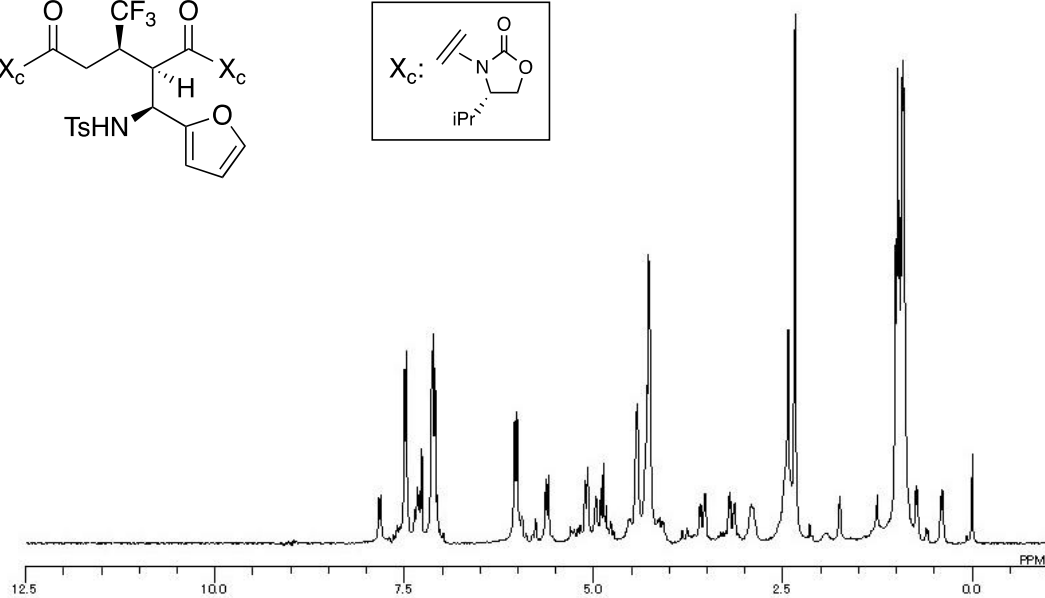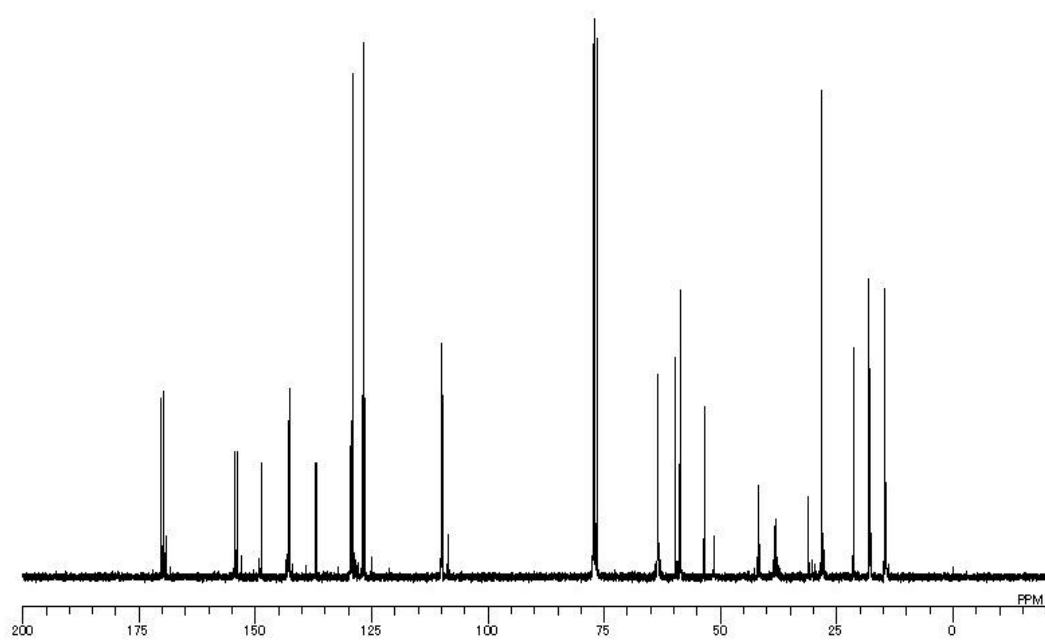

1,5-bis[(4*S*)-4-Isopropyl-2-oxo-1,3-oxazolidin-3-yl]-2-[(4-methylphenyl)(4-toluenesulfonamido)methyl]-3-(trifluoromethyl)pentane-1,5-dione (**3f**)

(Stereochemistry was assumed on the basis of the one of **3a**)

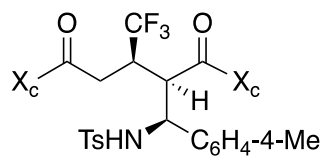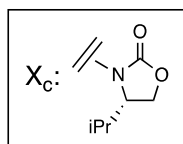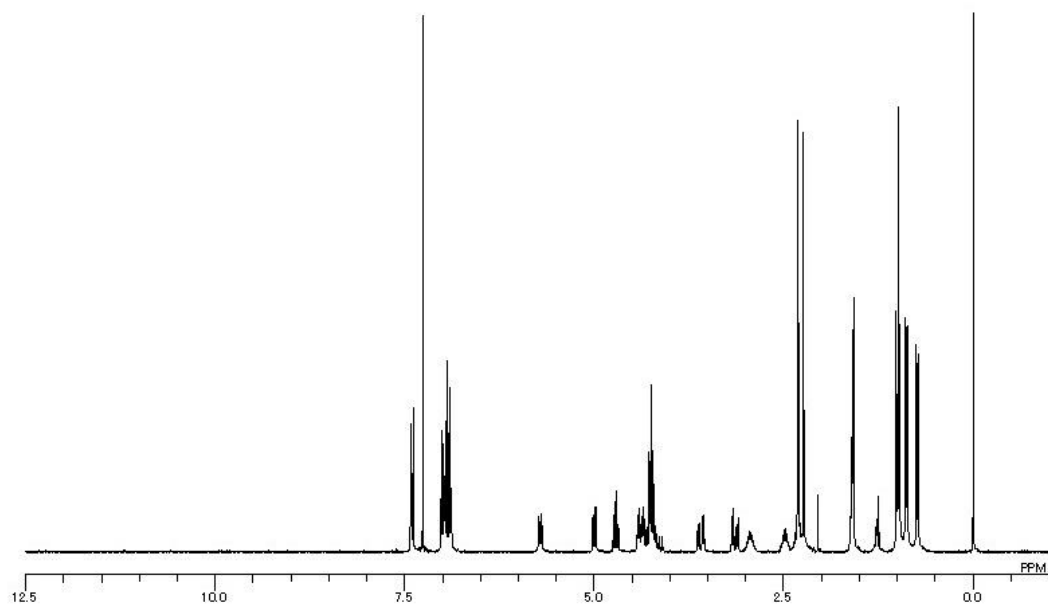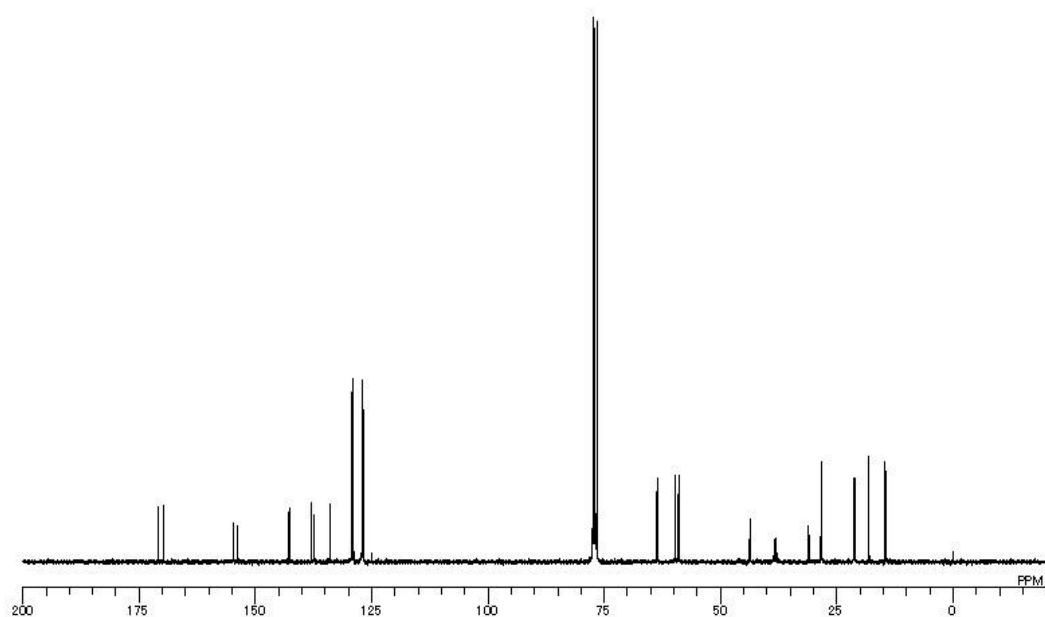

#### 4. Crystallographic data of the major isomer of compound 3a

|                                   |                                                                                                 |
|-----------------------------------|-------------------------------------------------------------------------------------------------|
| Deposition number                 | CCDC 1575731                                                                                    |
| Empirical formula                 | C <sub>32</sub> H <sub>38</sub> F <sub>3</sub> N <sub>3</sub> O <sub>8</sub> S                  |
| Formula weight                    | 681.71                                                                                          |
| Temperature                       | 173(2) K                                                                                        |
| Wavelength                        | 0.71073 Å                                                                                       |
| Crystal system                    | Orthorhombic                                                                                    |
| Space group                       | P2 <sub>1</sub> 2 <sub>1</sub> 2 <sub>1</sub>                                                   |
| Unit cell dimensions              | a = 11.5242(5) Å      α = 90°<br>b = 15.0568(6) Å      β = 90°<br>c = 19.4473(8) Å      γ = 90° |
| Volume                            | 3374.4(2) Å <sup>3</sup>                                                                        |
| Z                                 | 4                                                                                               |
| Density (calculated)              | 1.342 Mg/m <sup>3</sup>                                                                         |
| Absorption coefficient            | 0.166 mm <sup>-1</sup>                                                                          |
| F(000)                            | 1432                                                                                            |
| Crystal size                      | 0.230 x 0.210 x 0.170 mm <sup>3</sup>                                                           |
| Theta range for data collection   | 1.710 to 25.495°                                                                                |
| Index ranges                      | -13 ≤ h ≤ 13, -18 ≤ k ≤ 18, -23 ≤ l ≤ 23                                                        |
| Reflections collected             | 30358                                                                                           |
| Independent reflections           | 6261 [R(int) = 0.0325]                                                                          |
| Completeness to theta = 25.242°   | 99.7%                                                                                           |
| Absorption correction             | Semi-empirical from equivalents                                                                 |
| Max. and min. transmission        | 1.00000 and 0.87379                                                                             |
| Refinement method                 | Full-matrix least-squares on F <sup>2</sup>                                                     |
| Data / restraints / parameters    | 6261 / 1 / 429                                                                                  |
| Goodness-of-fit on F <sup>2</sup> | 1.041                                                                                           |
| Final R indices [I > 2σ(I)]       | R1 = 0.0415, wR2 = 0.1011                                                                       |
| R indices (all data)              | R1 = 0.0531, wR2 = 0.1104                                                                       |
| Absolute structure parameter      | -0.01(2)                                                                                        |
| Extinction coefficient            | n/a                                                                                             |
| Largest diff. peak and hole       | 0.231 and -0.234 e.Å <sup>-3</sup>                                                              |

Table S1. Atomic coordinates ( $\times 10^4$ ) and equivalent isotropic displacement parameters ( $\text{\AA}^2 \times 10^3$ ).  $U(\text{eq})$  is defined as one third of the trace of the orthogonalized  $U_{ij}$  tensor.

|       | x       | y       | z       | U(eq)  |
|-------|---------|---------|---------|--------|
| O(1)  | 5347(2) | 3420(2) | 3319(1) | 54(1)  |
| O(2)  | 5690(4) | 6178(2) | 3589(2) | 90(1)  |
| O(3)  | 5873(4) | 5743(2) | 4677(1) | 98(1)  |
| O(4)  | 1558(2) | 4058(2) | 1842(2) | 73(1)  |
| O(5)  | 2792(3) | 1691(2) | 2663(2) | 80(1)  |
| O(6)  | 1369(3) | 1130(2) | 2026(2) | 87(1)  |
| O(7)  | 8449(2) | 4849(2) | 1629(2) | 79(1)  |
| O(8)  | 7004(3) | 3754(2) | 1214(1) | 85(1)  |
| C(1)  | 4747(3) | 5034(2) | 1481(2) | 45(1)  |
| C(2)  | 4756(3) | 5949(2) | 1439(2) | 56(1)  |
| C(3)  | 4235(4) | 6377(3) | 890(2)  | 70(1)  |
| C(4)  | 3709(4) | 5897(3) | 380(2)  | 78(1)  |
| C(5)  | 3705(5) | 4999(3) | 410(2)  | 83(1)  |
| C(6)  | 4218(4) | 4557(3) | 960(2)  | 66(1)  |
| C(7)  | 5298(3) | 4549(2) | 2081(2) | 41(1)  |
| C(8)  | 4669(3) | 4739(2) | 2765(2) | 41(1)  |
| C(9)  | 5273(3) | 4223(2) | 3336(1) | 42(1)  |
| C(10) | 5732(4) | 5595(3) | 4003(2) | 71(1)  |
| C(11) | 5754(6) | 4937(3) | 5058(2) | 98(2)  |
| C(12) | 5998(4) | 4199(3) | 4539(2) | 63(1)  |
| C(13) | 7220(4) | 3846(3) | 4530(2) | 75(1)  |
| C(14) | 8155(5) | 4556(4) | 4447(3) | 104(2) |
| C(15) | 7434(6) | 3290(4) | 5187(3) | 111(2) |
| N(1)  | 6531(2) | 4777(2) | 2172(1) | 46(1)  |
| C(16) | 3358(3) | 4502(2) | 2727(2) | 46(1)  |
| C(17) | 2734(3) | 4814(3) | 3364(2) | 67(1)  |
| C(18) | 3066(3) | 3527(2) | 2582(2) | 51(1)  |
| C(19) | 2045(3) | 3436(2) | 2097(2) | 52(1)  |
| C(20) | 2034(4) | 1797(2) | 2249(2) | 61(1)  |

|       |         |          |         |        |
|-------|---------|----------|---------|--------|
| C(21) | 448(4)  | 1464(3)  | 1607(3) | 86(1)  |
| C(22) | 730(3)  | 2418(3)  | 1443(2) | 65(1)  |
| C(26) | 8057(3) | 3443(2)  | 2355(2) | 51(1)  |
| C(28) | 7965(5) | 2009(3)  | 2865(3) | 91(2)  |
| C(29) | 8925(4) | 2178(3)  | 3265(3) | 79(1)  |
| C(30) | 9438(4) | 2997(3)  | 3197(2) | 82(1)  |
| C(31) | 9015(3) | 3639(3)  | 2747(2) | 65(1)  |
| C(32) | 9394(6) | 1476(4)  | 3751(4) | 131(2) |
| S(1)  | 7528(1) | 4231(1)  | 1764(1) | 56(1)  |
| F(1)  | 3076(2) | 4384(2)  | 3936(1) | 93(1)  |
| F(2)  | 1584(2) | 4689(2)  | 3323(2) | 94(1)  |
| F(3)  | 2895(3) | 5675(2)  | 3496(2) | 96(1)  |
| N(2)  | 5682(3) | 4681(2)  | 3901(1) | 51(1)  |
| N(3)  | 1679(2) | 2574(2)  | 1939(2) | 54(1)  |
| C(33) | 1043(6) | 2563(6)  | 711(3)  | 143(3) |
| C(34) | 2064(7) | 2527(10) | 442(3)  | 226(6) |
| C(35) | -9(7)   | 2338(6)  | 251(4)  | 157(3) |
| C(36) | 7530(4) | 2625(3)  | 2409(2) | 73(1)  |

---

## 5. References

1. Watanabe, Y.; Yamazaki, T.; Kubota, T. *Org. Lett.* **2010**, *12*, 268–271.
2. Novacek, J.; Roiser, L.; Zielke, K.; Robiette, R.; Waser, M. *Chem. Eur. J.* **2016**, *22*, 11422–11428.
